# Supplementary material
Source: Springer Nature journal article supplement (https://www.springermedizin.de/resource/supplementary/12885_2008_1421_MOESM4_ESM.pdf/9473100)

**A**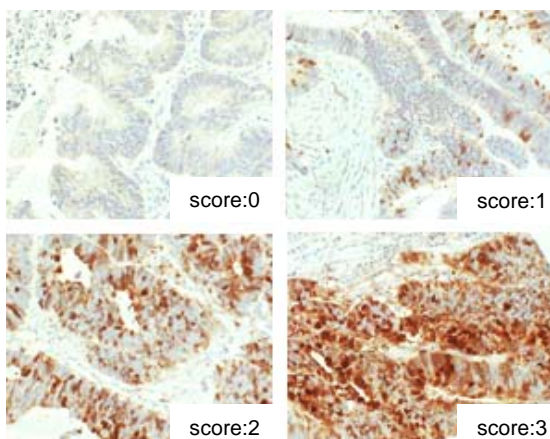**B**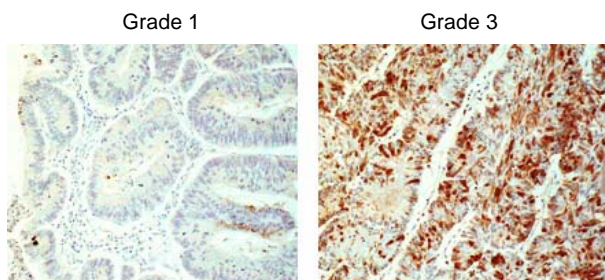**C**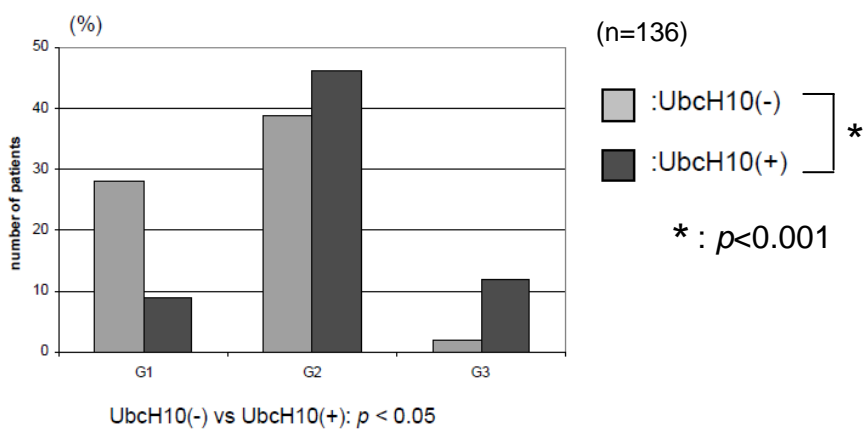

Supplement: MOESM4 [file 9473100]
